# Supplementary material for: The C-terminal coiled-coil domain of Corynebacterium diphtheriae DIP0733 is crucial for interaction with epithelial cells and pathogenicity in invertebrate animal model systems
Source: PubMed Central journal article supplement (PMC6123952; doi:10.1186/s12866-018-1247-z), 2018-09-04
Supplement: 12866_2018_1247_MOESM1_ESM.pdf [file 12866_2018_1247_MOESM1_ESM.pdf]

**a**

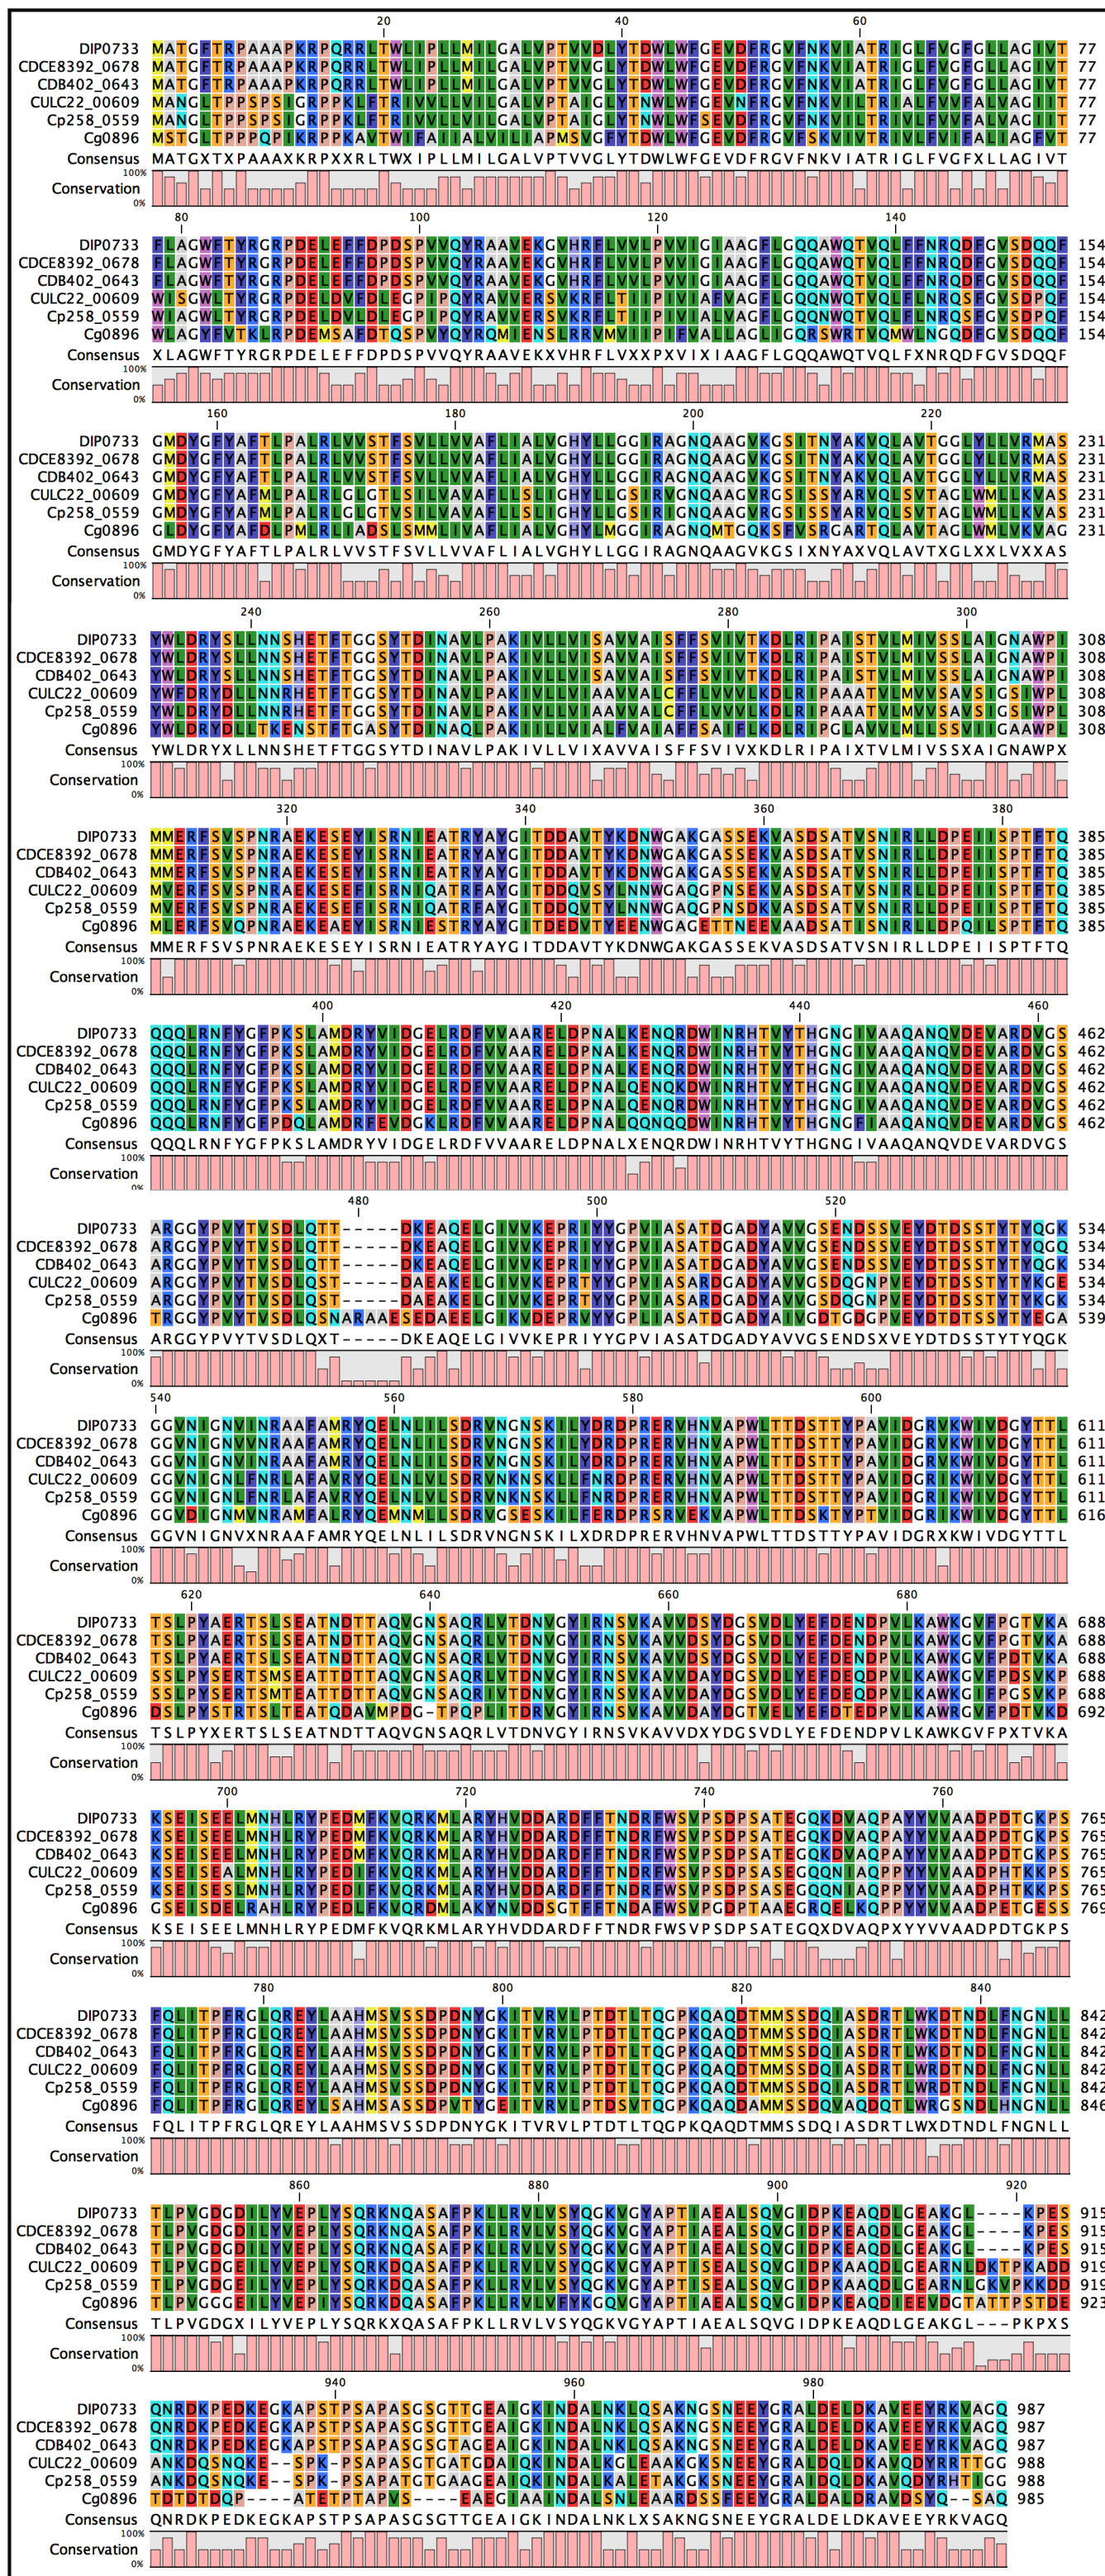

**b**

| Strain                                              | Accession  | Query cover | Score            | Identity     | Gaps       |
|-----------------------------------------------------|------------|-------------|------------------|--------------|------------|
| <i>C. diphtheriae</i> CDC-E8392 <i>CDC8392_0678</i> | AEX71676.1 | 100%        | 2010 bits (5207) | 984/987(99%) | 0/987(0%)  |
| <i>C. diphtheriae</i> INCA 402 <i>CDB402_0643</i>   | AEX45950.1 | 100%        | 2006 bits (5198) | 984/987(99%) | 0/987(0%)  |
| <i>C. ulcerans</i> BR-AD22 <i>CULC22_00609</i>      | AEG83325.1 | 99%         | 1666 bits (4315) | 797/988(81%) | 3/988(0%)  |
| <i>C. pseudotuberculosis</i> 258 <i>Cp258_0559</i>  | AFK16201.1 | 99%         | 1665 bits (4312) | 798/990(81%) | 7/990(0%)  |
| <i>C. glutamicum</i> ATCC 13032 <i>Cg0896</i>       | CAF19491.1 | 99%         | 1396 bits (3614) | 670/987(68%) | 10/987(1%) |
